# Supplementary material
Source: MDPI journal article supplement (https://www.mdpi.com/2304-6732/10/11/1259)
Supplement: s1 [file s1]

**Table. S1** Detailed parameters for the radius of four samples.

|                 | Sample <sub>3</sub> | Sample <sub>4</sub> | Sample <sub>5</sub> | Sample <sub>6</sub> |
|-----------------|---------------------|---------------------|---------------------|---------------------|
| R <sub>1</sub>  | 15.50 $\mu\text{m}$ | 15.50 $\mu\text{m}$ | 15.50 $\mu\text{m}$ | 15.50 $\mu\text{m}$ |
| R <sub>2</sub>  | 15.88 $\mu\text{m}$ | 15.88 $\mu\text{m}$ | 15.88 $\mu\text{m}$ | 15.88 $\mu\text{m}$ |
| R <sub>3</sub>  | 16.25 $\mu\text{m}$ | 16.25 $\mu\text{m}$ | 16.25 $\mu\text{m}$ | 16.25 $\mu\text{m}$ |
| R <sub>4</sub>  | 16.62 $\mu\text{m}$ | 16.62 $\mu\text{m}$ | 16.62 $\mu\text{m}$ | 16.62 $\mu\text{m}$ |
| R <sub>5</sub>  | 16.99 $\mu\text{m}$ | 16.99 $\mu\text{m}$ | 16.99 $\mu\text{m}$ | 16.99 $\mu\text{m}$ |
| R <sub>6</sub>  | 17.35 $\mu\text{m}$ | 17.35 $\mu\text{m}$ | 17.35 $\mu\text{m}$ | 17.35 $\mu\text{m}$ |
| R <sub>7</sub>  | 17.72 $\mu\text{m}$ | 17.72 $\mu\text{m}$ | 17.72 $\mu\text{m}$ | 17.72 $\mu\text{m}$ |
| R <sub>8</sub>  | 18.08 $\mu\text{m}$ | 18.08 $\mu\text{m}$ | 18.08 $\mu\text{m}$ | 18.08 $\mu\text{m}$ |
| R <sub>9</sub>  | 18.44 $\mu\text{m}$ | 18.44 $\mu\text{m}$ | 18.44 $\mu\text{m}$ | 18.44 $\mu\text{m}$ |
| R <sub>10</sub> | 18.80 $\mu\text{m}$ | 18.80 $\mu\text{m}$ | 18.80 $\mu\text{m}$ | 18.80 $\mu\text{m}$ |
| R <sub>11</sub> | 19.16 $\mu\text{m}$ | 19.16 $\mu\text{m}$ | 19.16 $\mu\text{m}$ | 19.16 $\mu\text{m}$ |
| R <sub>12</sub> | 19.51 $\mu\text{m}$ | 19.51 $\mu\text{m}$ | 19.51 $\mu\text{m}$ | 19.51 $\mu\text{m}$ |

**Table. S2** Detailed parameters for the rotation direction of four samples.

|            | Sample <sub>3</sub> | Sample <sub>4</sub> | Sample <sub>5</sub> | Sample <sub>6</sub> |
|------------|---------------------|---------------------|---------------------|---------------------|
| $\theta_1$ | 3                   | 4                   | 5                   | 6                   |
| $\theta_2$ | 1.5                 | 2                   | 2.5                 | 3                   |
| $\theta_3$ | 0                   | 0                   | 0                   | 0                   |
| $\theta_4$ | -1.5                | -2                  | -2.5                | -3                  |
| $\theta_5$ | -3                  | -4                  | -5                  | -6                  |
| $\theta_6$ | -4.5                | -6                  | -7.5                | -9                  |

**Table. S3** Detailed Orbital Angular Momentum parameters of four samples.

|                | Sample <sub>3</sub> | Sample <sub>4</sub> | Sample <sub>5</sub> | Sample <sub>6</sub> |
|----------------|---------------------|---------------------|---------------------|---------------------|
| L <sub>1</sub> | -6                  | -8                  | -10                 | -12                 |

|       |    |    |    |    |
|-------|----|----|----|----|
| $L_2$ | -3 | -4 | -5 | -6 |
| $L_3$ | 0  | 0  | 0  | 0  |
| $L_4$ | 3  | 4  | 5  | 6  |
| $L_5$ | 6  | 8  | 10 | 12 |
| $L_6$ | 9  | 12 | 15 | 18 |
